# Supplementary material
Source: Springer Nature journal article supplement (https://www.springermedizin.de/resource/supplementary/12939_2011_221_MOESM1_ESM.pdf/9550642)
Supplement: MOESM1 [file 9550642]

(1) Financial application and name list of Wubao, Dibao, Tekun and Youfu

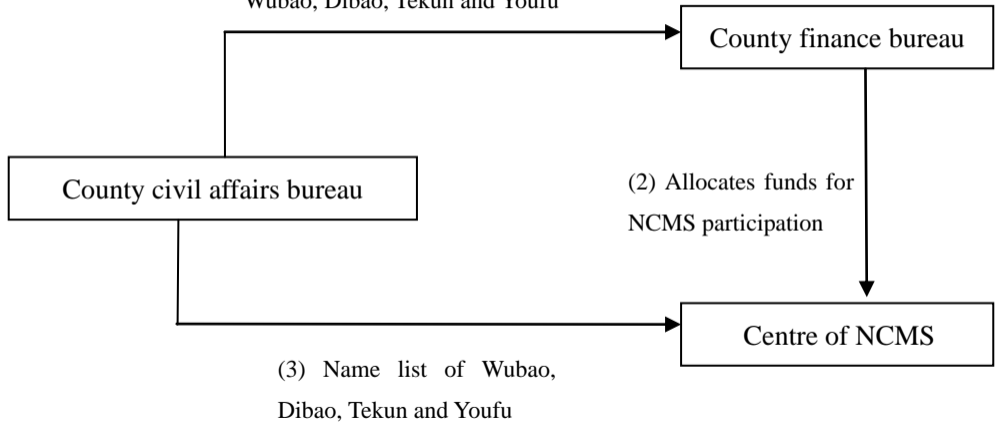

County finance bureau

County civil affairs bureau

(2) Allocates funds for NCMS participation

Centre of NCMS

(3) Name list of Wubao, Dibao, Tekun and Youfu
